# Supplementary material
Source: PubMed Central journal article supplement (PMC3446850)
Supplement: NIHMS349902-supplement-supplement_1.pdf [file NIHMS349902-supplement-supplement_1.pdf]

**Appendix/Supplementary material**

**Figure S1: Viral load set point by HSV-2 serostatus in vaccine and placebo HIV seroconverters**

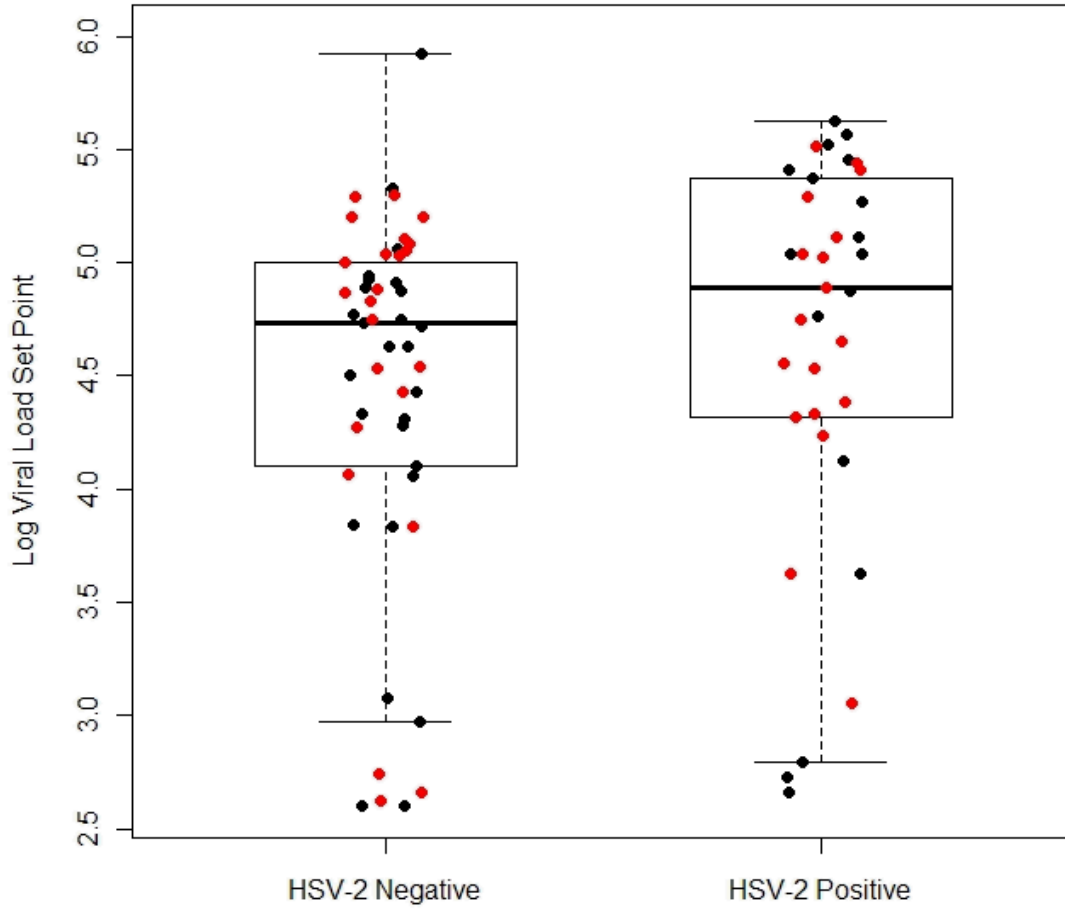

**Appendix Table 1: Univariate logistic regression analysis of baseline factors associated with baseline HSV-2 sero-status**

| Baseline factor                                                              | Prevalence of the baseline factor in the study cohort (%) | odds ratio | 95% Lower-bound | 95% Upper-bound | Univariate p-value |
|------------------------------------------------------------------------------|-----------------------------------------------------------|------------|-----------------|-----------------|--------------------|
| Male circumcision (circumcised)                                              | 56                                                        | 0.28       | 0.24            | 0.33            | <0.001             |
| Race (White)                                                                 | 49                                                        | 0.27       | 0.23            | 0.31            | <0.001             |
| Age younger than 30 years                                                    | 53                                                        | 0.32       | 0.28            | 0.37            | <0.001             |
| North America and Australia region                                           | 65                                                        | 0.31       | 0.27            | 0.35            | <0.001             |
| Ad5 titer greater than 18                                                    | 58                                                        | 0.53       | 0.47            | 0.61            | <0.001             |
| STD (yes)                                                                    | 3                                                         | 0.83       | 0.48            | 1.42            | 0.49               |
| GUD (yes)                                                                    | 0.7                                                       | 3          | 0.9             | 13.52           | 0.1                |
| Risk behaviors (6 months prior to enrollment)                                |                                                           |            |                 |                 |                    |
| Any Drug use                                                                 | 27                                                        | 0.39       | 0.32            | 0.48            | <0.001             |
| POPPERS use                                                                  | 7                                                         | 0.46       | 0.32            | 0.66            | <0.001             |
| SPEED use                                                                    | 3                                                         | 0.4        | 0.21            | 0.73            | 0.004              |
| Number of male partners (>4)                                                 | 17                                                        | 0.77       | 0.61            | 0.96            | 0.02               |
| Unprotected receptive anal sex with HIV positive partner (yes)               | 2                                                         | 0.44       | 0.21            | 0.87            | 0.02               |
| Unprotected receptive anal sex with HIV-negative partner (yes)               | 11                                                        | 0.45       | 0.33            | 0.6             | <0.001             |
| Unprotected receptive anal sex with HIV-negative partner (yes)               | 11                                                        | 0.71       | 0.53            | 0.94            | 0.02               |
| Unprotected insertive anal sex with HIV positive partner (yes)               | 5                                                         | 0.44       | 0.28            | 0.69            | <0.001             |
| Unprotected insertive anal sex with HIV-negative partner (yes)               | 13                                                        | 0.32       | 0.24            | 0.43            | <0.001             |
| Unprotected insertive anal sex with HIV-negative partner (yes)               | 22                                                        | 0.43       | 0.33            | 0.57            | <0.001             |
| Unprotected receptive anal sex regardless of partners' HIV sero-status (yes) | 22                                                        | 0.57       | 0.46            | 0.7             | <0.001             |
| Unprotected insertive anal sex regardless of partners' HIV sero-status (yes) | 27                                                        | 0.36       | 0.3             | 0.44            | <0.001             |
